# Supplementary material
Source: Springer Nature journal article supplement (https://www.springermedizin.de/resource/supplementary/12887_2004_71_MOESM3_ESM.pdf/9477198)

### Use of postnatal steroids

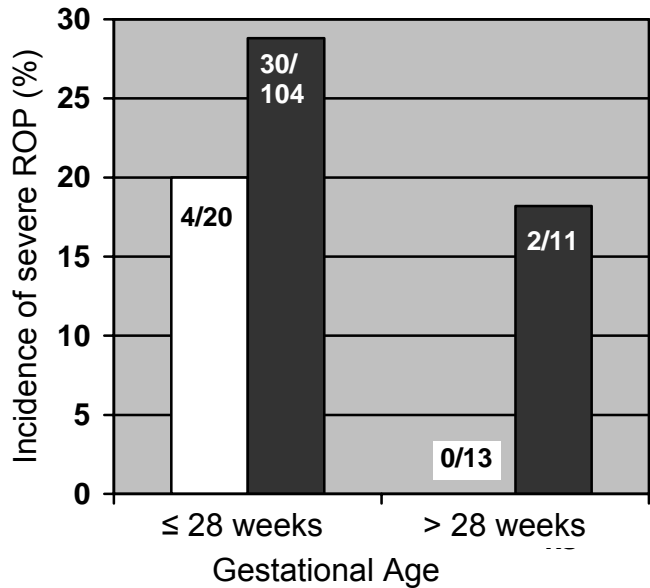

### Duration of Ventilation

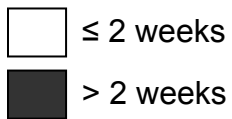

### No postnatal steroids

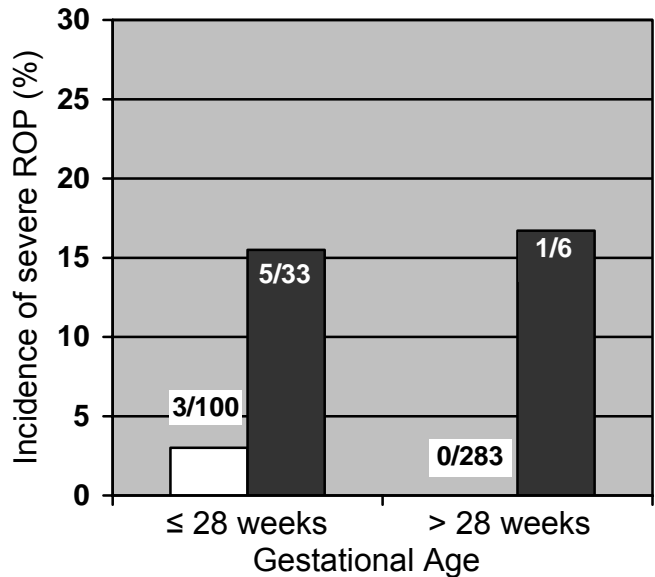

Supplement: MOESM3 [file 9477198]
